# Supplementary material
Source: Springer Nature journal article supplement (https://www.springermedizin.de/resource/supplementary/12936_2014_3681_MOESM3_ESM.pdf/9546078)

## A Study 1134

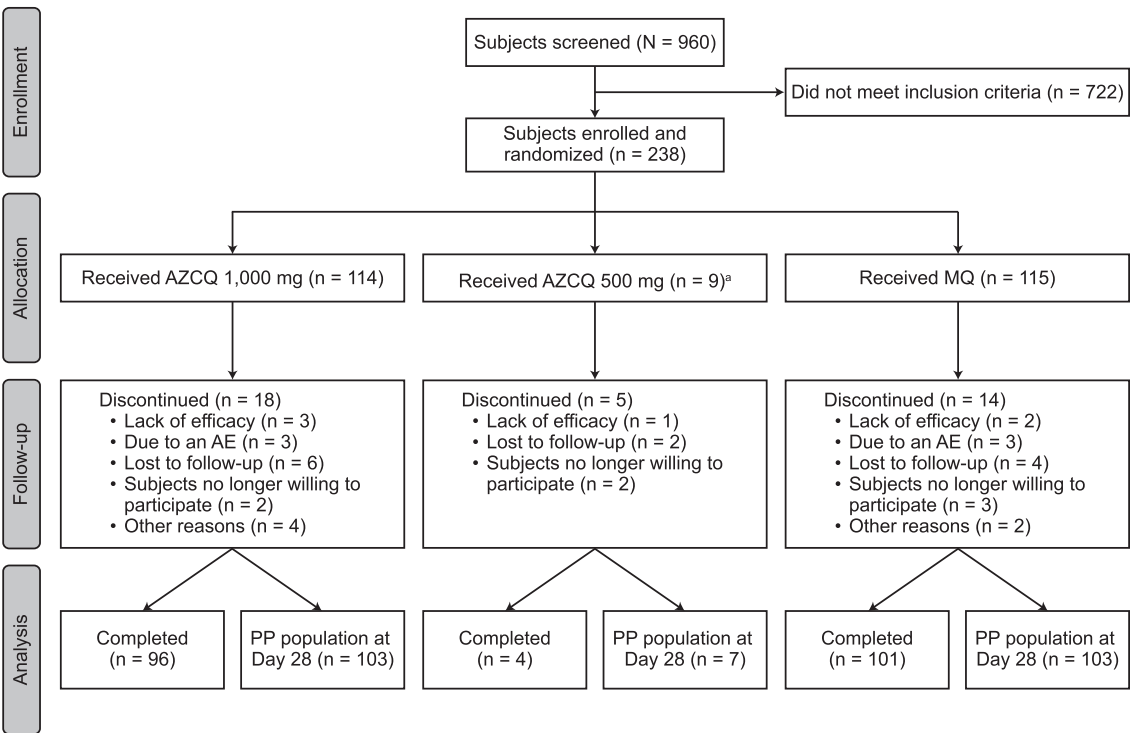

## B Study 1155

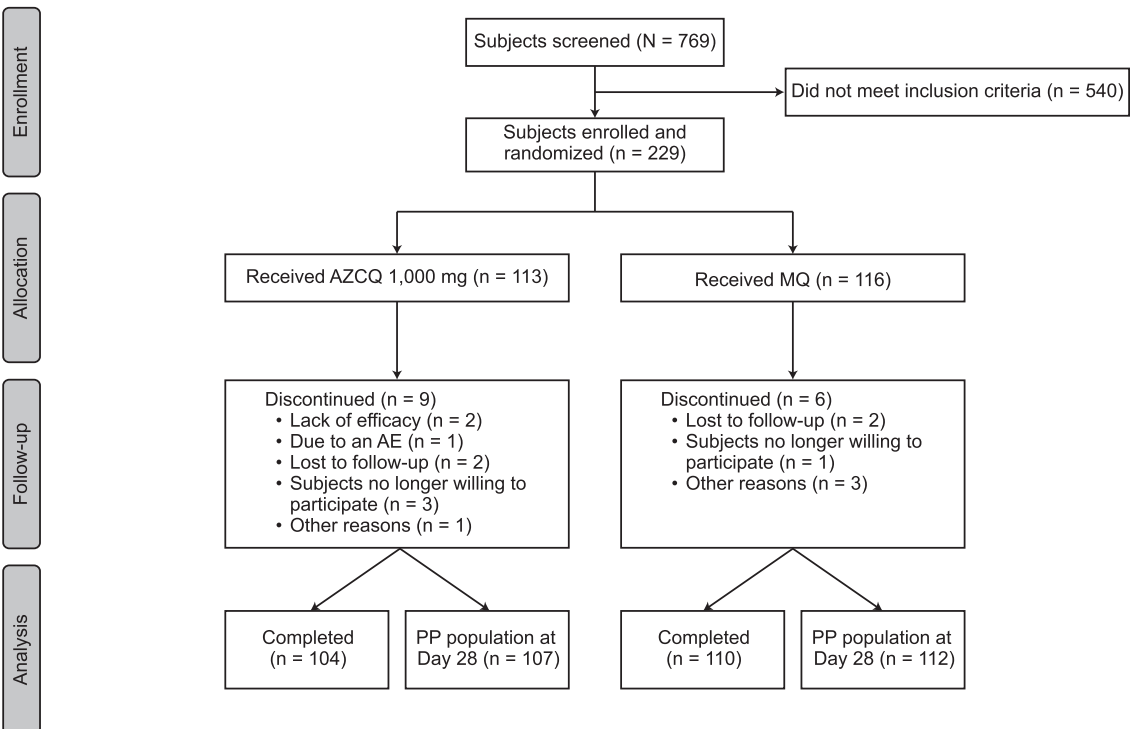

Supplement: MOESM3 [file 9546078]
